# Supplementary material for: Tumor invasion in draining lymph nodes is associated with Treg accumulation in breast cancer patients
Source: PubMed Central journal article supplement (PMC7324591; doi:10.1038/s41467-020-17046-2), 2020-06-29
Supplement: 41467_2020_17046_MOESM1_ESM.pdf [file 41467_2020_17046_MOESM1_ESM.pdf]

## SUPPLEMENTARY INFORMATION

### **Tumor invasion in draining lymph nodes is associated with Treg accumulation in breast cancer patients**

Nicolas Gonzalo Núñez, Jimena Tosello et al.

Corresponding author:

Eliane Piaggio. E-mail: [eliane.piaggio@curie.fr](mailto:eliane.piaggio@curie.fr)

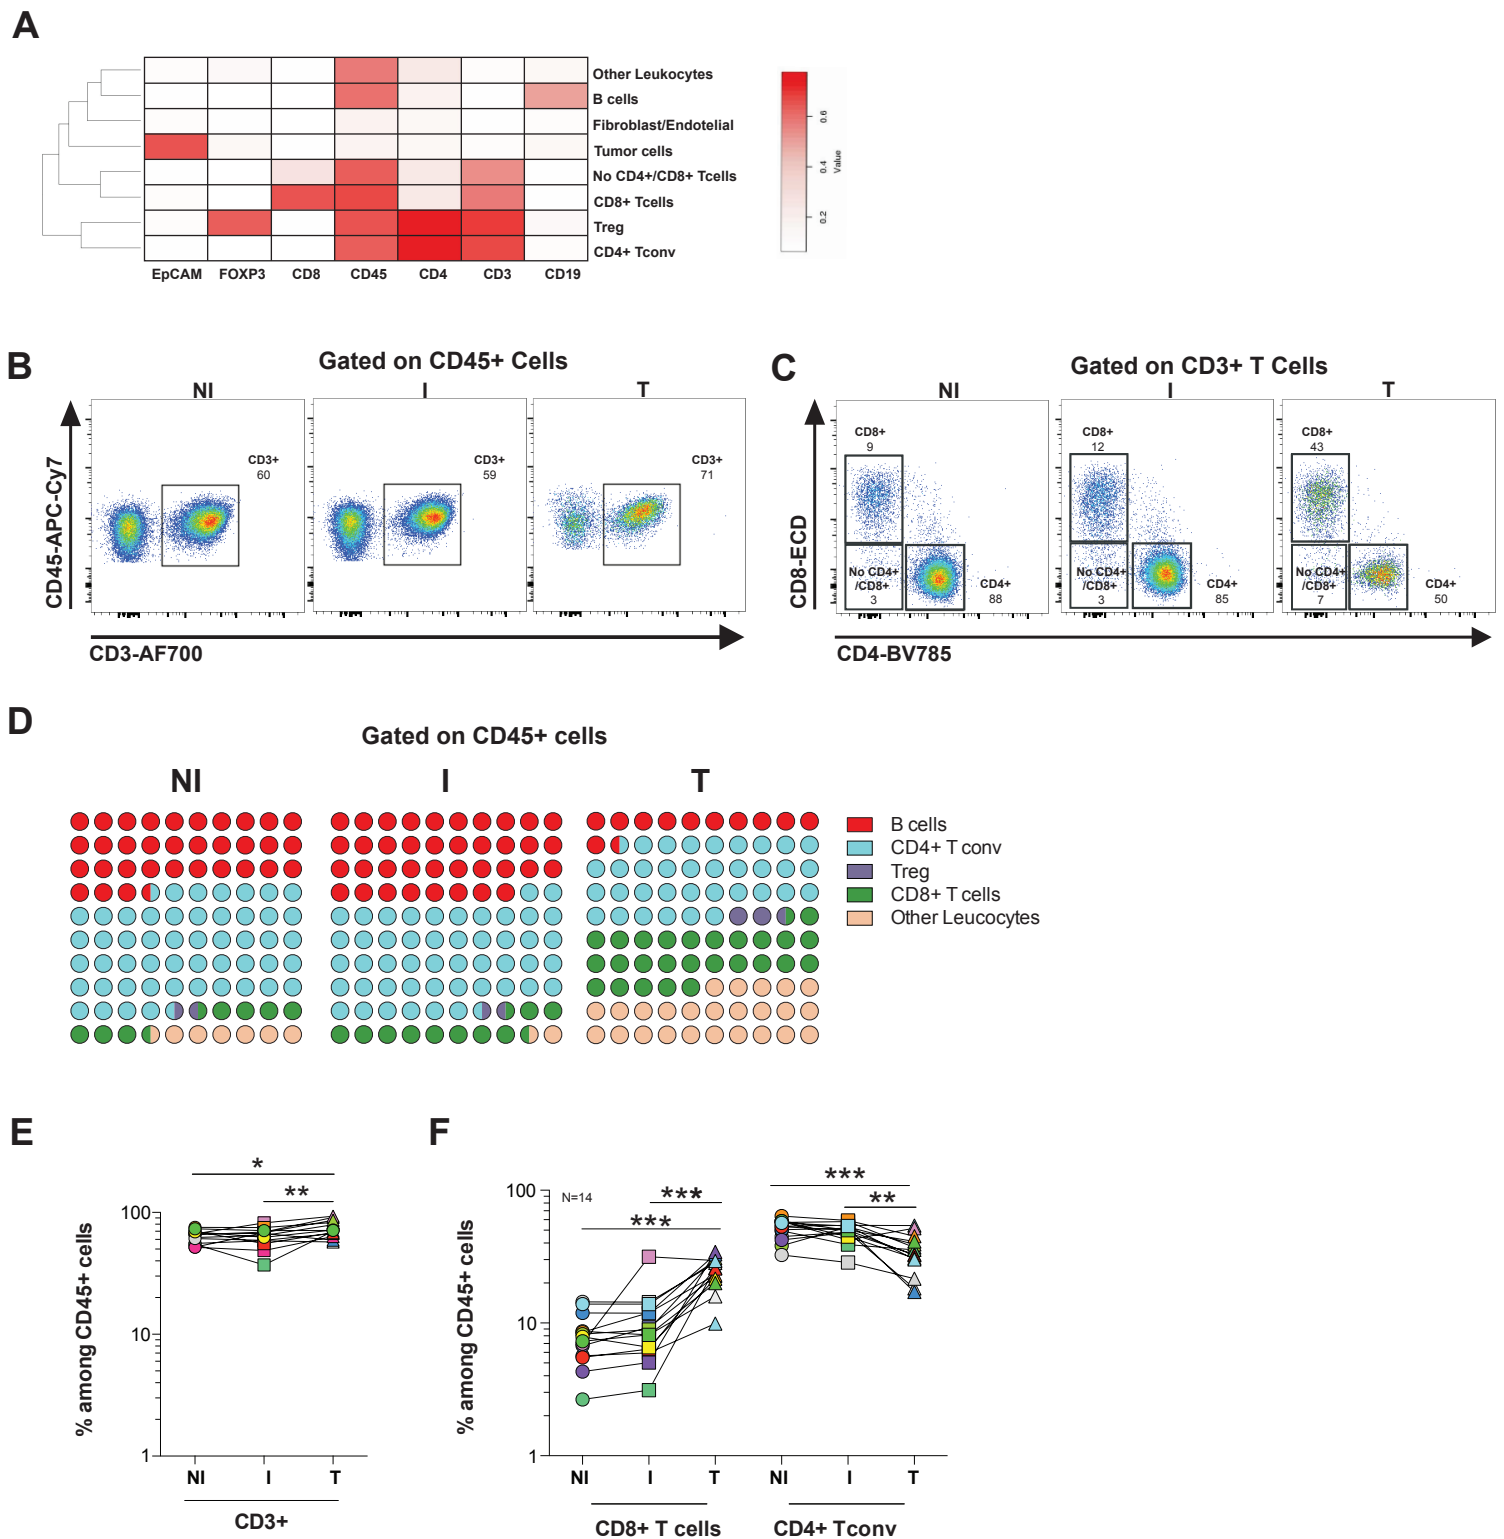

**Supplementary Figure 1.** Overall distribution of immune cell populations in NI and I TDLNs, and tumor. Cell suspensions of TDLNs and tumors were stained for CD45, CD3, CD4 and CD8. A) Heat map showing the median marker expression value for each defined population from Figure 1E. Red and white indicate higher and lower expression, respectively. B) Representative flow cytometric analysis of CD3+ T cells among CD45+ cells. C) Representative flow cytometric analysis of CD4+ and CD8+ T cells among CD3+ T cells. D) Frequencies of B cell and T cell subpopulations among CD45+ cells in TDLNs and tumor. E) Frequency of T cells among CD45+ cells in TDLNs and tumor (NI TDLN vs T  $p=0.017$ ; I TDLN vs T  $p=0.0037$ ). Wilcoxon matched-pairs signed rank test. (N=13). F) Frequency of CD8+ and CD4+ Tconvs among CD45+ cells in TDLNs and tumor (CD8+ T cells: NI TDLN vs T  $p=0.0001$ ; I TDLN vs T  $p=0.0002$ ; CD4+ Tconv: NI TDLN vs T  $p=0.0006$ ; I TDLN vs T  $p=0.0012$ ). Wilcoxon matched-pairs signed rank test, \*,  $p < 0.05$ , \*\*,  $p < 0.01$ , \*\*\*,  $p < 0.001$ . (N=14).

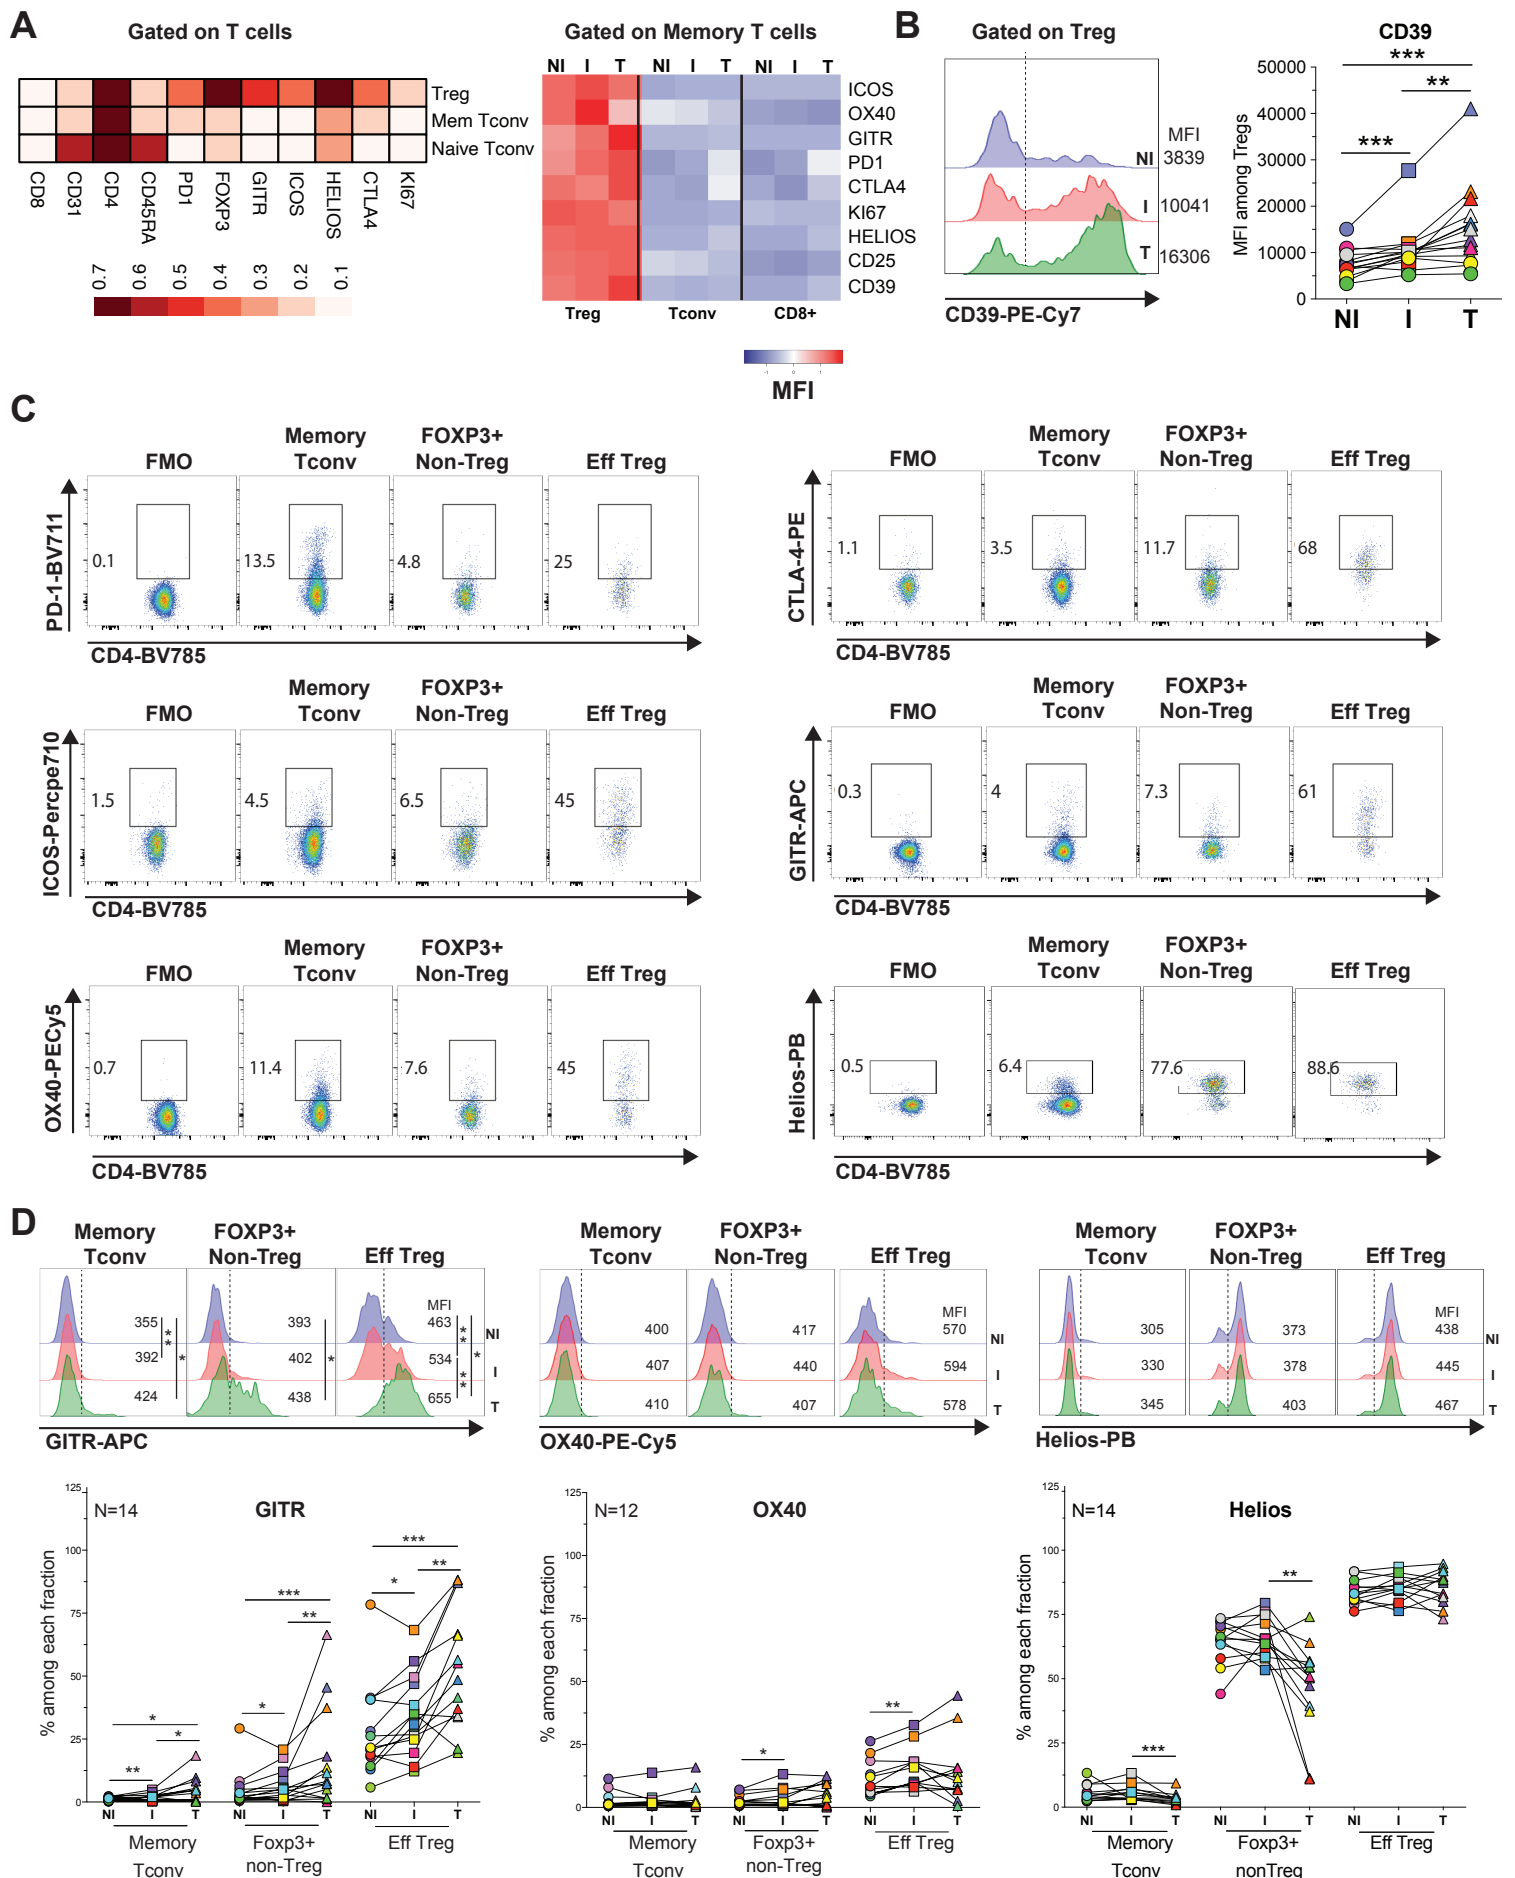

**Supplementary Figure 2. Immune checkpoint expression profile of CD4+T cells from TDLNs and tumor.** Cell suspensions of TDLNs and tumors were stained for CD3, CD4, CD45RA, FOXP3, ICOS, GITR, OX40, PD-1, CTLA-4, CD31, CD25, CD39, HELIOS and KI67. A) Heat maps showing the median marker expression value for each defined population (left panel) or each tissue (right panel) from Figure 2A. Red and blue indicate higher and lower expression, respectively. B) Representative flow cytometric analysis and MFIs for CD39 among Eff Tregs in TDLNs and tumor. NI vs I TDLNs  $p=0.0009$ ; NI TDLN vs T  $p=0.0001$ ; I TDLN vs T  $p=0.0012$ . Wilcoxon matched-pairs signed rank test. (N=14). C) Representative flow cytometric analysis and MFIs for PD-1, CTLA-4, ICOS, GITR, OX40 and Helios among the indicated memory CD4+ T cell subpopulations. D) Representative histograms and frequencies of GITR (Memory Tconv: NI vs I TDLNs  $p=0.0031$ ; NI TDLN vs T  $p=0.0101$ ; I TDLN vs T  $p=0.0494$ ; FOXP3+non-Treg: NI vs I TDLNs  $p=0.0419$ ; NI TDLN vs T  $p=0.0009$ ; I TDLN vs T  $p=0.0052$ ; Eff Treg: NI vs I TDLNs  $p=0.0245$ ; NI TDLN vs T  $p=0.0001$ ; I TDLN vs T  $p=0.0017$ ), OX40 (FOXP3+non-Treg: NI vs I TDLNs  $p=0.0425$ ; Eff Treg: NI vs I TDLNs  $p=0.0024$ ) and Helios (Memory Tconv: I TDLN vs T  $p=0.0005$ ; FOXP3+non-Treg: I TDLN vs T  $p=0.0024$ ) among the indicated memory CD4+ T cell subpopulations in TDLNs and tumor. (N=14). Wilcoxon matched-pairs signed rank test, \*,  $p < 0.05$ , \*\*,  $p < 0.01$ , \*\*\*,  $p < 0.001$ .

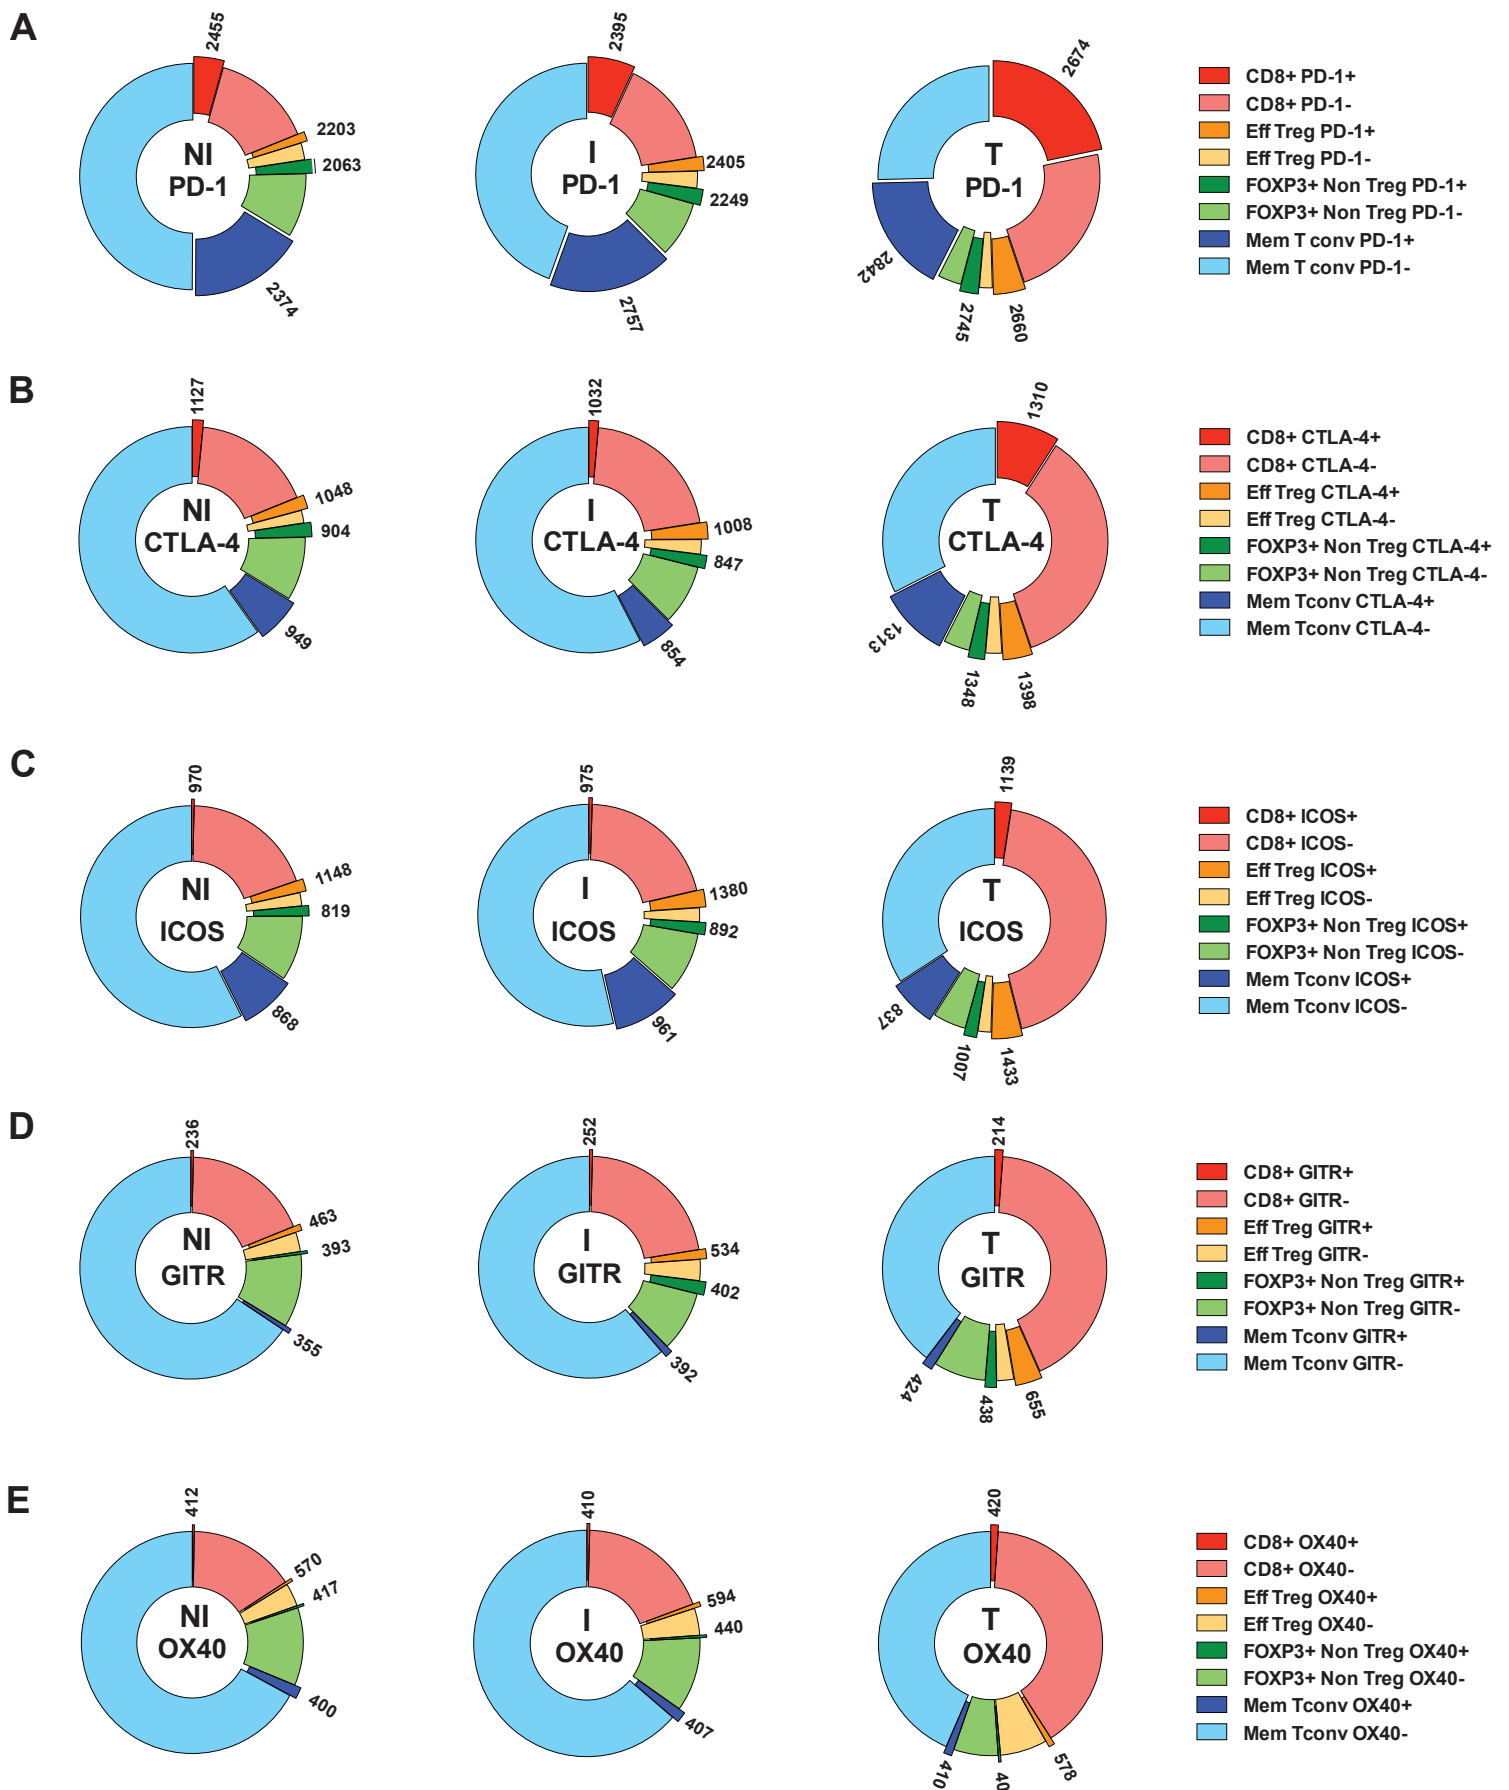

**Supplementary Figure 3. Immune checkpoint expression profile of T cells from TDLNs, and tumor.** Pie charts illustrating the relative size of CD8+ T cells, effector Tregs, FOXP3+ Non Treg (activated Tconvs) and, memory Tconvs cell populations expressing PD-1(A), CTLA-4(B), ICOS(C), GITR(D), and OX40(E). Exploded and darker slices represent the positive and target populations. The data are quoted as the mean MFI for each T cell subpopulation (N=12).

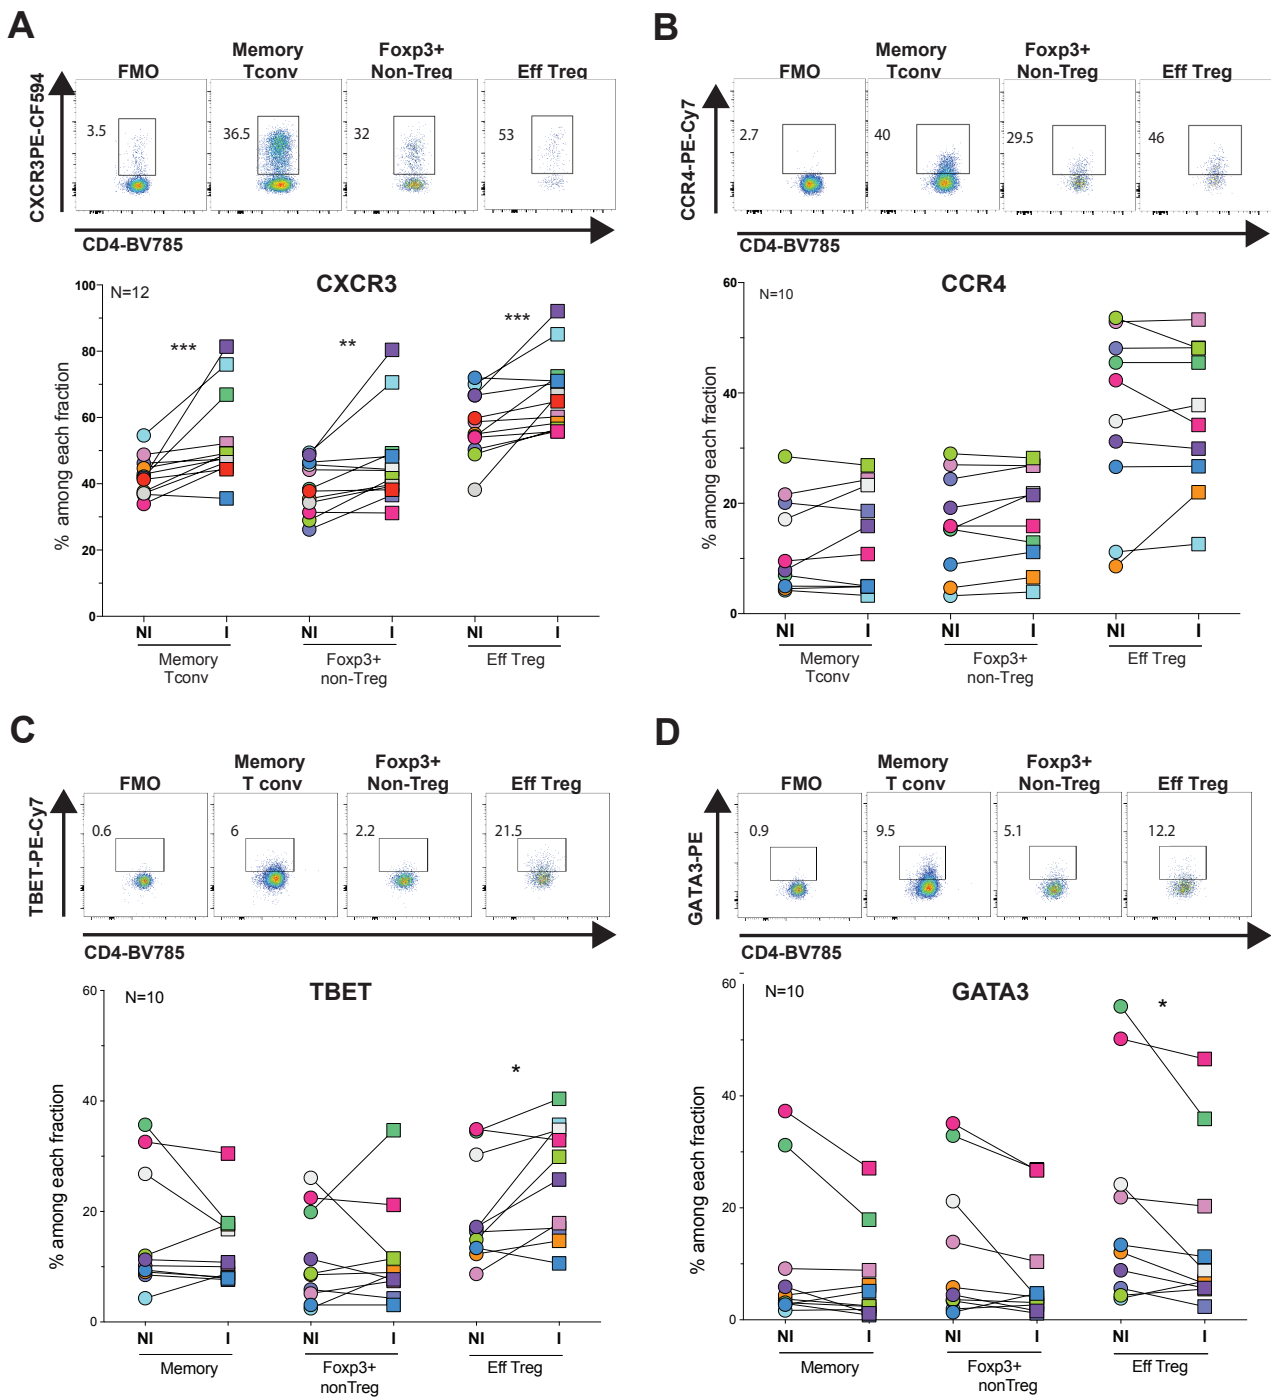

**Supplementary Figure 4. CD4+ T cell chemokine receptors and transcription factors in TDLNs.** Cell suspensions of TDLNs were stained for CD3, CD4, CD45RA, FOXP3, CXCR3, CCR4, Tbet and Gata3. Representative flow cytometric analysis (upper panel) and frequency (lower panel) of (A) CXCR3 (Memory Tconv:  $p=0.0010$ ; Foxp3+non-Treg:  $p=0.0088$ ; Eff Treg:  $p=0.0010$  in NI vs I TDLNs), (B) CCR4, (C) Tbet (Eff Treg:  $p=0.0273$  in NI vs I TDLNs) and (D) Gata3 (Eff Treg:  $p=0.0195$  in NI vs I TDLNs) among gated CD4+ T cell subpopulations (N=12) in TDLNs. Wilcoxon matched-pairs signed rank test, \*,  $P < 0.05$ , \*\*,  $P < 0.01$ , \*\*\*,  $P < 0.001$

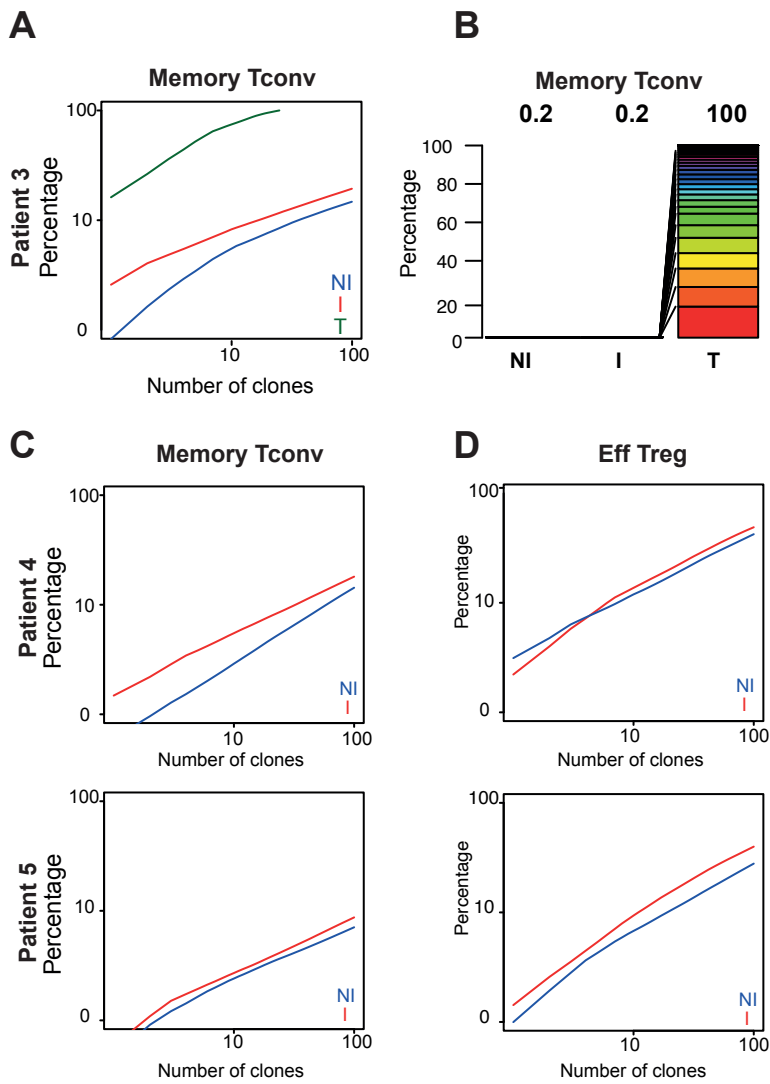

**Supplementary Figure 5. TCR repertoire of Tconvs and Tregs from TDLNs, and tumor.** Next-generation-sequencing-based high-throughput TCR- $\beta$  CDR3 analysis of bulk sorted memory T CD4<sup>+</sup> Tconvs and Tregs from matched NI and I TDLNs and the primary tumor. A, C-D) Graphs show cumulative frequencies of TCR- $\beta$  CDR3 clones of memory Tconv or Tregs from NI TDLNs (blue), I TDLNs (red) and the corresponding primary tumor when available (green), for three patients. B) Stacked bar chart depicting the usage frequencies of the top 100 tumor TCR- $\beta$  CDR3 sequences and their distribution in matched NI and I TDLNs shown for Tconvs, for one patient. Numbers in the graphs indicate percentage of shown TCR- $\beta$  CDR3 sequences out of total TCR- $\beta$  CDR3 sequences in the sample.

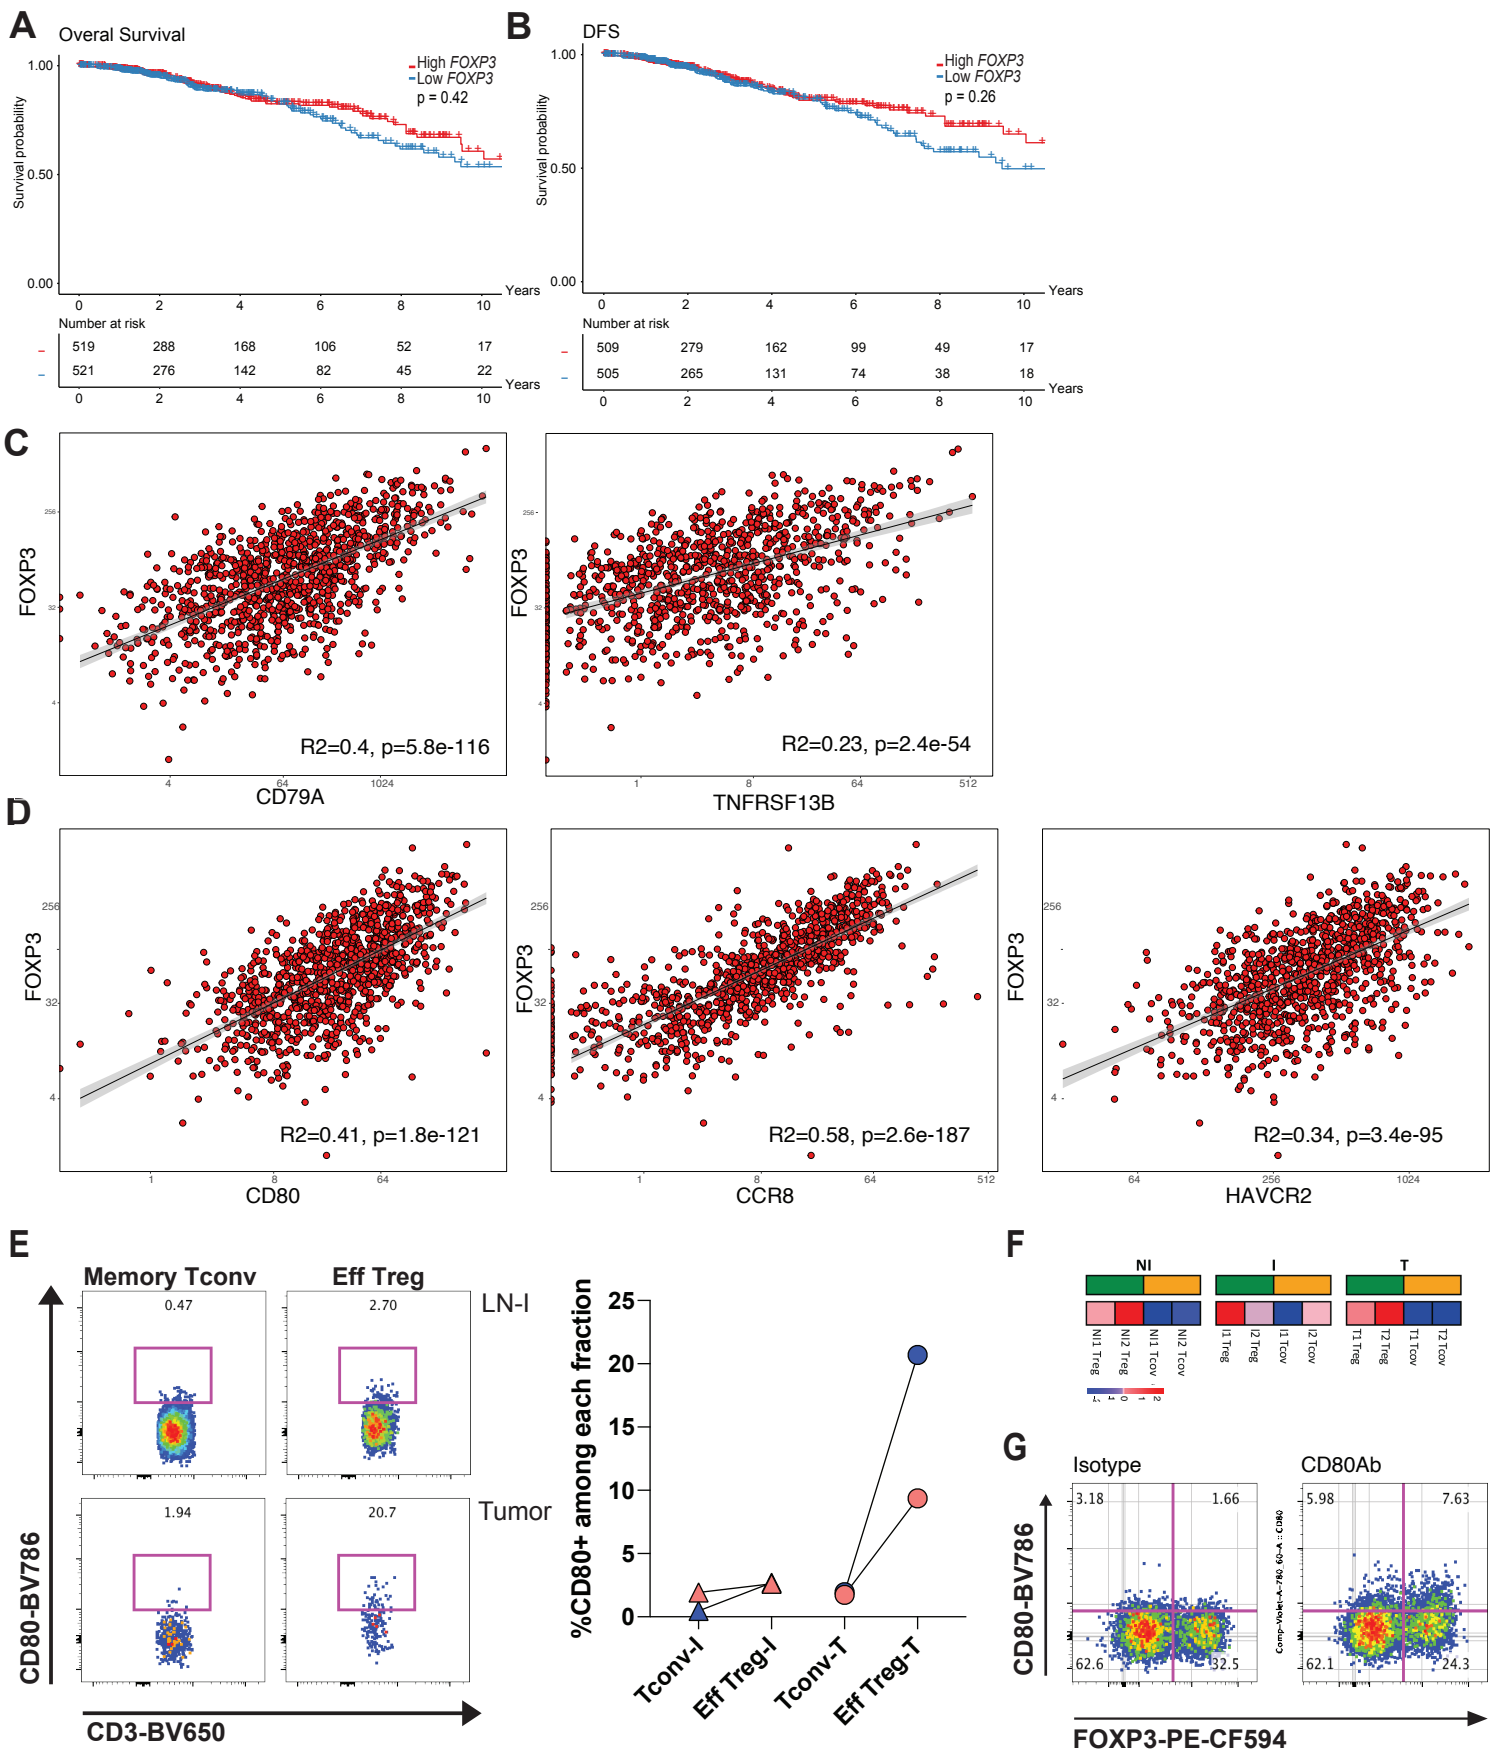

**Supplementary Figure 6. Clinical outcome of DEGs normalized to FOXP3 and CD80 expression.** OS (A) and DFS (B) of patients with breast cancer stratified by high or low median intensity of the *FOXP3* gene. (C) Scatter plots and linear regression graphs of the correlation between the reads per million (RPM) of *CD79A*, *TNFRSF13B* genes vs *FOXP3* gene. (D) Scatter plots and linear regression graphs of the correlation between the reads per million (RPM) of *CD80*, *CCR8* and *HAVCR2* genes vs *FOXP3* gene. (E) Representative flow cytometric analysis (left panel) and frequency (right panel) of CD80 expression on Tconv and Treg cells from I TDLNs or tumor (N=2). (F) Heatmaps showing CD80 gene expression on Tregs and Tconvs from the 3 tissues. (G) Representative dot plot of CD80 expression versus FOXP3 expression on gated CD4<sup>+</sup> T cells from tumor.

**Supplementary Table 1. Clinical and pathological data of the luminal breast cancer patients**

| <b>Characteristics</b>                       | <b>Patients<br/>(N=54)</b> | <b>Value</b> |
|----------------------------------------------|----------------------------|--------------|
| Age (years)                                  |                            | 57 ± 14      |
| <b>Lymph node status</b>                     |                            |              |
| Negative (N0)                                | 0                          | 0%           |
| N1 (1–3)                                     | 30                         | 56%          |
| N2 (4–9)                                     | 14                         | 26%          |
| N3 (>9)                                      | 10                         | 19%          |
| <b>Stage</b>                                 |                            |              |
| I                                            | 0                          | 0%           |
| II                                           | 26                         | 48%          |
| III                                          | 27                         | 50%          |
| IV                                           | 1                          | 2%           |
| <b>Histology</b>                             |                            |              |
| Invasive ductal carcinoma (IDC)              | 42                         | 78%          |
| Invasive lobular carcinoma (ILC)             | 8                          | 15%          |
| Others (papillary, medullary, mucinous)      | 4                          | 7%           |
| <b>Tumor size (cm)</b>                       |                            |              |
| T1 (≤2)                                      | 16                         | 30%          |
| T2 (2–5)                                     | 28                         | 52%          |
| T3 (>5)                                      | 10                         | 19%          |
| <b>Hormone receptor status</b>               |                            |              |
| Estrogen receptor (ER)                       | 53                         | 98%          |
| Progesterone receptor (PR)                   | 45                         | 83%          |
| <b>Histological grade (Elston and Ellis)</b> |                            |              |
| Well differentiated (I)                      | 5                          | 9%           |
| Moderately differentiated (II)               | 31                         | 57%          |
| Poorly differentiated (III)                  | 18                         | 33%          |



**Supplementary Table 2. Immune profile of matched NI and I TDLNs and tumors**

| <b>Among/CD45</b>   | <b>NI (Mean <math>\pm</math> SD)</b> | <b>I (Mean <math>\pm</math> SD)</b> | <b>T (Mean <math>\pm</math> SD)</b> |
|---------------------|--------------------------------------|-------------------------------------|-------------------------------------|
| <b>B cells</b>      | 33,27 $\pm$ 8,09                     | 38,12 $\pm$ 6,13                    | 11,56 $\pm$ 3,51                    |
| <b>Tconv</b>        | 51,25 $\pm$ 8,95                     | 48,2 $\pm$ 8,07                     | 33,31 $\pm$ 11,26                   |
| <b>Treg</b>         | 0,88 $\pm$ 0,75                      | 1,38 $\pm$ 1,32                     | 3,87 $\pm$ 5,34                     |
| <b>CD8+ T cells</b> | 8,23 $\pm$ 3,39                      | 10,71 $\pm$ 6,95                    | 26,16 $\pm$ 6,76                    |

**Supplementary Table 3. TCR beta repertoire of CD4+ T cells from TDLNs and tumors****Tconv**

| Patient | Sample | Number of sorted CD4+ Tconv cells | TCR beta              |                  |                     |
|---------|--------|-----------------------------------|-----------------------|------------------|---------------------|
|         |        |                                   | Total number of reads | Number of clones | % of shared clones* |
| 1       | NI     | 478993                            | 393624                | 28246            | 1,0                 |
|         | I      | 412819                            | 167364                | 16214            | 10,5                |
|         | T      | 18294                             | 82181                 | 511              | 100,0               |
| 2       | NI     | 796012                            | 606802                | 40265            | 3,4                 |
|         | I      | 613134                            | 162613                | 18735            | 4,5                 |
|         | T      | 17014                             | 82303                 | 1118             | 100,0               |
| 3       | NI     | 680475                            | 377915                | 25178            | 0,2                 |
|         | I      | 514570                            | 337532                | 8805             | 0,2                 |
|         | T      | 2637                              | 35796                 | 25               | 100,0               |
| 4       | NI     | 333649                            | 2045304               | 5022             | NA                  |
|         | I      | 245321                            | 73691                 | 6856             | NA                  |
| 5       | NI     | 628078                            | 613389                | 45005            | NA                  |
|         | I      | 279838                            | 142722                | 21283            | NA                  |

\* among top 100 clones in the tumor

**Treg**

| Patient | Sample | Number of sorted Treg cells | TCR beta              |                  |                     |
|---------|--------|-----------------------------|-----------------------|------------------|---------------------|
|         |        |                             | Total number of reads | Number of clones | % of shared clones* |
| 1       | NI     | 15000                       | 226679                | 1429             | 2,6                 |
|         | I      | 25206                       | 357978                | 3542             | 1,9                 |
|         | T      | 2015                        | 63779                 | 73               | 100,0               |
| 2       | NI     | 14578                       | 401493                | 1951             | 1,6                 |
|         | I      | 9972                        | 104711                | 829              | 17,5                |
|         | T      | 500                         | 50831                 | 66               | 100,0               |
| 3       | NI     | 10129                       | 70418                 | 492              | NA                  |
|         | I      | 15125                       | 71691                 | 375              | NA                  |
| 4       | NI     | 15100                       | 443905                | 983              | NA                  |
|         | I      | 20059                       | 35986                 | 750              | NA                  |
| 5       | NI     | 15062                       | 199055                | 1966             | NA                  |
|         | I      | 10044                       | 103601                | 1105             | NA                  |

\* among top 100 clones in the tumor

**Supplementary Table 4. TCR beta repertoire overlap of CD4+ T cells from matched TDLNs and tumors**

| <b>Shared TCRs between Tregs and Tconvs in each tissue</b> |                   |             |             |             |             |             |             |
|------------------------------------------------------------|-------------------|-------------|-------------|-------------|-------------|-------------|-------------|
| Tissue                                                     | Patients          | 1           | 2           | 3           | 4           | 5           | Mean        |
|                                                            | TCRs              |             |             |             |             |             |             |
| NI                                                         | # clones          | 184         | 449         | 144         | 21          | 408         |             |
|                                                            | <b>% of Tregs</b> | <b>12,9</b> | <b>23,0</b> | <b>29,3</b> | <b>2,1</b>  | <b>20,8</b> | <b>17,6</b> |
| I                                                          | # clones          | 483         | 134         | 54          | 84          | 179         |             |
|                                                            | <b>% of Tregs</b> | <b>13,6</b> | <b>16,2</b> | <b>14,4</b> | <b>11,2</b> | <b>16,2</b> | <b>14,3</b> |
| T                                                          | # clones          | 14          | 16          | ND          | ND          | ND          |             |
|                                                            | <b>% of Tregs</b> | <b>19,2</b> | <b>24,2</b> | ND          | ND          | ND          | <b>21,7</b> |

| <b>Shared TCR between T-Tregs and TDLN's Tconvs</b> |                   |             |             |    |    |    |             |
|-----------------------------------------------------|-------------------|-------------|-------------|----|----|----|-------------|
| Tissue                                              | Patients          | 1           | 2           | 3  | 4  | 5  | Mean        |
|                                                     | TCRs              |             |             |    |    |    |             |
| T-Tregs vs<br>NI-Tconvs                             | # clones          | 7           | 16          | ND | ND | ND |             |
|                                                     | <b>% of Tregs</b> | <b>9,6</b>  | <b>24,2</b> | ND | ND | ND | <b>16,9</b> |
| T-Tregs vs<br>I-Tconvs                              | # clones          | 16          | 18          | ND | ND | ND |             |
|                                                     | <b>% of Tregs</b> | <b>16,4</b> | <b>27,3</b> | ND | ND | ND | <b>21,9</b> |

\*The percentage of shared clones was calculated as number of shared clones/ total number of Treg clones x 100, for each tissue.

**Supplementary Table 5. Clones and providers of FACs antibodies**

| Antigens | Clones    | Fluorochromes | Dilution | Isotypes       | Manufacturers    |
|----------|-----------|---------------|----------|----------------|------------------|
| 2B4      | C1.7      | APC           | 1/100    | mouse IgG1, κ  | BD Biosciences   |
| CD27     | O323      | BV605         | 1/200    | mouse IgG1, κ  | BD Biosciences   |
| CD3      | OKT3      | BV650         | 1/100    | mouse IgG2a, κ | BD Biosciences   |
| CD4      | OKT4      | BV785         | 1/150    | mouse IgG2b, κ | BD Biosciences   |
| PD1      | EH12.2H7  | BV711         | 1/100    | mouse IgG1, κ  | BD Biosciences   |
| TIM3     | F38-2E2   | BV421         | 1/100    | mouse IgG1, κ  | BD Biosciences   |
| GITR     | DT5D3     | APC           | 1/100    | mouse IgG1     | Miltenyi Biotec  |
| TIM-3    | RMT3-23   | APC           | 1/50     | mouse IgG1κ    | Miltenyi Biotec  |
| KLRG1    | REA261    | APC-Vio770    | 1/100    | human IgG1     | Miltenyi Biotec  |
| CD8      | 3B5       | Alexa 700     | 1/100    | mouse IgG2a, κ | ThermoScientific |
| EPCAM    | 1B7       | PERCP e710    | 1/100    | mouse IgG1, κ  | eBioscience      |
| ICOS     | ISA-3     | PERCP e710    | 1/100    | mouse IgG1, κ  | eBioscience      |
| CD8      | 2ST8.5H7  | ECD           | 1/50     | mouse IgG2a    | Beckman Coulter  |
| CD56     | N901      | PE-Cy5        | 1/200    | mouse IgG1     | Beckman Coulter  |
| CD3      | UCHT1     | PE-Cy7        | 1/200    | mouse IgG1, κ  | Beckman Coulter  |
| CD3      | UCHT1     | Alexa 700     | 1/100    | mouse IgG1, κ  | BD Biosciences   |
| CD45     | 2D1       | APC Cy7       | 1/100    | mouse IgG1, κ  | BD Biosciences   |
| CD19     | HIB19     | Alexa 700     | 1/50     | mouse IgG1, κ  | BD Biosciences   |
| CD80     | L307.4    | BV786         | 1/50     | mouse IgG1, κ  | BD Biosciences   |
| CD4      | M-T466    | APC           | 1/100    | mouse IgG1, κ  | Miltenyi Biotec  |
| CD45RA   | HI100     | Alexa 700     | 1/100    | mouse IgG2b, κ | BD Biosciences   |
| CD45RA   | HI100     | PE-Cy5        | 1/100    | mouse IgG2b, κ | BD Biosciences   |
| OX40     | ACT35     | PECy5         | 1/100    | mouse IgG1, κ  | BD Biosciences   |
| CD25     | M-A251    | PE            | 1/20     | mouse IgG1, κ  | BD Biosciences   |
| CD25     | M-A251    | APC Cy7       | 1/20     | mouse IgG1, κ  | BD Biosciences   |
| CD4      | RPA-T4    | PE-CF594      | 1/250    | mouse IgG1, κ  | BD Biosciences   |
| CCR6     | G034E3    | BV605         | 1/150    | mouse IgG1, κ  | BioLegend™       |
| CXCR5    | 51505     | APC           | 1/100    | mouse IgG2b, κ | R&D              |
| CXCR3    | 1C6/CXCR3 | PE-CF594      | 1/50     | mouse IgG1, κ  | BD Biosciences   |
| CCR4     | 1G1       | PE-Cy7        | 1/100    | mouse IgG1, κ  | BD Biosciences   |
| CCR7     | GO43H7    | BV421         | 1/80     | mouse IgG2a, κ | BioLegend™       |
| CRTh2    | BM16      | FITC          | 1/100    | rat IgG2A, κ   | BioLegend™       |
| CD127    | A019D5    | BV650         | 1/40     | mouse IgG1, κ  | BioLegend™       |
| CCR10    | FAB3478P  | PE            | 1/100    | rat IgG2A      | R&D              |

**INTRACELLULAR**

| Antigens  | Clones          | Fluorochromes | Dilution | Isotypes      | Manufacturers  |
|-----------|-----------------|---------------|----------|---------------|----------------|
| FOXP3     | 236A/E7         | Alexa 488     | 1/20     | mouse IgG1, κ | eBioscience    |
| FOXP3     | 236A/E7         | PE            | 1/20     | mouse IgG1, κ | eBioscience    |
| FOXP3     | 259D/C7         | PE-CF594      | 1/20     | mouse IgG1, κ | BD Biosciences |
| GranzymeB | GB11            | Alexa647      | 1/200    | mouse IgG1, κ | BD Biosciences |
| CTLA-4    | Goat polyclonal | PE            | 1/100    |               | R&D            |
| IL17      | BL168           | BV711         | 1/100    | mouse IgG1, κ | BioLegend™     |

|              |     |      |       |                      |                |
|--------------|-----|------|-------|----------------------|----------------|
| IFN $\gamma$ | B27 | V450 | 1/100 | mouse IgG1, $\kappa$ | BD Biosciences |
|--------------|-----|------|-------|----------------------|----------------|

**LIVE/DEAD**

|              |  |  |  |  |                  |
|--------------|--|--|--|--|------------------|
| Fixable Aqua |  |  |  |  | ThermoScientific |
|--------------|--|--|--|--|------------------|

**Supplementary Table 6. TCR beta primers**

**PCR1 Forward primers**

Alpha Forward

|          |                             |
|----------|-----------------------------|
| TRAV1    | CTGCACGTACCAGACATCTGGGTT    |
| TRAV2    | GGCTCAAAGCCTTCTCAGCAGG      |
| TRAV3    | GGATAACCTGGTTAAAGGCAGCTA    |
| TRAV4    | GGATACAGACAAAAGTTACAAAACGA  |
| TRAV5    | GCTGACGTATATTTTTCAAAATATGGA |
| TRAV6    | GGAAAGAGCCCTGTTTTCTTGCT     |
| TRAV7    | GCTGGATATGAGAAGCAGAAGGA     |
| TRAV8    | AGGACTCCAGCTTCTCTGAAGTA     |
| TRAV9    | GTATGTCCAATATCTCGGAGAAGGT   |
| TRAV10   | CAGTGAGAACCAAAAGTCGAACGG    |
| TRAV12.1 | CCTAAGTTGCTGATGTCGGTATAC    |
| TRAV12.2 | GGGAAAAGCCCTGAGTTGATAATGT   |
| TRAV12.3 | GCTGATGTACACATACTCCAGTGG    |
| TRAV13.1 | CCCTTGGTATAAGCAAGAACTGG     |
| TRAV13.2 | CCTCAATTTCATTATAGACATTGTTT  |
| TRAV14   | GCAAAATGCAACAGAAGGTCGCTA    |
| TRAV16   | TAGAGAGACATCAAAGGCTTCCAC    |
| TRAV17   | CGTTCAAATGAAAAGAGAAAACACAG  |
| TRAV18   | CCTGAAAAGTTCAGAAAACAGGAG    |
| TRAV19   | GGTCGGTATCTTGGAACTTCCAG     |
| TRAV20   | GCTGGGGAAGAAAAGGAGAAAAGAA   |
| TRAV21   | GTACAGAGAGCAAAACAAAGTGGAA   |
| TRAV22   | GGACAAAACAGAATGGAAGATTAAGC  |
| TRAV23   | CCAGATGTGAGTAAAAGAAAAGAA    |
| TRAV24   | GACTTTAAATGGGGATGAAAAGAA    |
| TRAV25   | GGAGAAGTGAAGAAGCAGAAAAGAC   |
| TRAV26.1 | CCAATGAAATGGCCTCTCTGATCA    |
| TRAV26.2 | GCAATGTGAACAACAGAATGGCCT    |
| TRAV27   | GGTGAGAAAGTGAAGAAGCTGAAG    |
| TRAV29   | GGATAAAAATGAAGATGGAAGATTCAC |
| TRAV30   | CTGATGATATTAAGTGAAGGTGGA    |
| TRAV34   | GGTGGGGAAGAGAAAAGTCATGAA    |
| TRAV35   | GGTGAATGACCTCAAATGGAAGAC    |
| TRAV36   | GCTAACTCAAGTGAATGAAAAGA     |
| TRAV38   | GAAGCTTATAAGCAACAGAAATGCAAC |
| TRAV39   | GGAGCAAGTGAAGCAGGAGGAC      |
| TRAV40   | GAGAGACAATGAAAACAGCAAAAAC   |
| TRAV41   | GCTGAGCTCAGGGAAGAAGAAGC     |

Beta Forward

|            |                               |
|------------|-------------------------------|
| TRBV2      | CTGAAATATTCGATGATCAATTCCTCAG  |
| TRBV3-1    | TCATTATAAATGAAACAGTCCAAATCG   |
| TRBV4      | AGTGTGCCAAGTCGCTTCTCAC        |
| TRBV5-4,8  | CAGAGGAAACTYCCCTCTAGATT       |
| TRBV5-1    | GAGACACAGAGAAAACAAAGGAACTTC   |
| TRBV6-1    | GGTACCCTGACAAAAGGAGAAGTCC     |
| TRBV6-2,3  | GAGGGTACAACCTGCCAAGGAGAGGT    |
| TRBV6-4    | GGCAAAGGAGAAAGTCCCTGATGTT     |
| TRBV6-5,6  | AAGGAGAAGTCCCSAATGGCTACAA     |
| TRBV6-8    | CTGACAAAAGAAAGTCCCAATGGCTAC   |
| TRBV6-9    | CACTGACAAAAGGAGAAGTCCCGAT     |
| TRBV7-2    | AGACAAATCAGGGCTGCCAGTGA       |
| TRBV7-3    | GACTCAGGGCTGCCAACGAT          |
| TRBV7-8    | CCAGAATGAAGCTCAACTAGACAA      |
| TRBV7-4,6  | GGTTCTCTGACAGAGCGCTGAG        |
| TRBV7-7    | GGCTGCCAGTATGATGGTTCTC        |
| TRBV7-9    | GACTTACTCCAGAATGAAGCTCAACT    |
| TRBV9      | GAGCAAAAGGAAACATTTTGAACGATT   |
| TRBV10-1,3 | GGCTRAATCAATCTCATATGGTGT      |
| TRBV10-2   | GATAAAGGAGAAGTCCCGATGGCT      |
| TRBV11     | GATTCACAGTTGCCAAGGATCGAT      |
| TRBV12-3,4 | GATTCAGGGATGCCCGAGGATCG       |
| TRBV12-5   | GATTCGGGGATGCCGAAGGATCG       |
| TRBV13     | GCAGAGCGATAAAGGAAGCATCCCT     |
| TRBV14     | TCCGGTATGCCAACAAATCGATTCT     |
| TRBV15     | GATTTTAAACAATGAAAGCAGACCCCT   |
| TRBV16     | GATGAAAACAGGTATGCCCAAGGAAA    |
| TRBV18     | TATCATAGATGAGTCAGAAATGCCAAAAG |
| TRBV19     | GACTTTGAGAAAAGGAGATATAGCTGAA  |
| TRBV20-1   | CAAGGCCACATACGAGCAAGGGCTC     |
| TRBV24-1   | CAAAAGATATAAACAAGGAGAGATCTCT  |
| TRBV25-1   | AGAGAAGGGAGATCTTCTCTGACT      |
| TRBV27-1   | GACTGATAAGGGAGATGTTCTGAA      |
| TRBV28     | GGCTGATCTATTTCTCATATGATGTTAA  |
| TRBV29     | GCCACATATGAGAGTGGATTTGTCATT   |
| TRBV30     | GGTGCCCCAGAAATCTCTCAGCT       |

**PCR1 & 2 Reverse primers**

Alpha Reverse with CS2 adaptor (in orange)

|          |                                                |
|----------|------------------------------------------------|
| CS2-TRAC | TACGGTAGCAGAGACTTGGTCTCGGTGAATAGGCAGACAGACTTGT |
|----------|------------------------------------------------|

Beta Reverse with CS2 adaptor (in orange)

|          |                                               |
|----------|-----------------------------------------------|
| CS2-TRBC | TACGGTAGCAGAGACTTGGTCTTACCAGTGTGCCCTTTGGGTGTG |
|----------|-----------------------------------------------|

**PCR2 Forward primers**

Nested alpha forward 2 with adaptor CS1 (in red)

|          |                                                    |
|----------|----------------------------------------------------|
| TRAV1    | ACACTGACGACATGGTTCTACAAGGTCGTTTTTCTTCTTCTTCTAGTC   |
| TRAV2    | ACACTGACGACATGGTTCTACAACGATACAACTGACCTATGAACGG     |
| TRAV3.1  | ACACTGACGACATGGTTCTACACTTTGAAGCTGAATTTAAACAGGCGC   |
| TRAV4.1  | ACACTGACGACATGGTTCTACAACCTCCCTGTTTCTCCCTGGCAGC     |
| TRAV5.1  | ACACTGACGACATGGTTCTACAACCAAGACCAAGACTCACTGTTT      |
| TRAV6    | ACACTGACGACATGGTTCTACAAGACTGAAGGTCACCTTTGATACC     |
| TRAV7    | ACACTGACGACATGGTTCTACAACAAATGCTACATTAAGGAAATGG     |
| TRAV8    | ACACTGACGACATGGTTCTACAGCATCAACGGTTTTGAGGCTGAATTTAA |
| TRAV9    | ACACTGACGACATGGTTCTACAACCACTCTTTCCACTTGGAGAA       |
| TRAV10   | ACACTGACGACATGGTTCTACATACAGCACTCTGGATGCAGACAC      |
| TRAV12   | ACACTGACGACATGGTTCTACAAGAGTGAAGGTTTACAGCACA        |
| TRAV13.1 | ACACTGACGACATGGTTCTACAGACTTCTGTTCAAAATGTTGGCGAA    |
| TRAV13.2 | ACACTGACGACATGGTTCTACAAGCAAGGCGCAAGACTCAACCGT      |
| TRAV14   | ACACTGACGACATGGTTCTACATCCAGAGGCAAGAAAATCCGCCA      |
| TRAV16   | ACACTGACGACATGGTTCTACAGCTGACCTTAAACAAAGGCGAGACA    |
| TRAV17   | ACACTGACGACATGGTTCTACATTAAGAGTCAAGGTTGACACTTCCA    |
| TRAV18   | ACACTGACGACATGGTTCTACAGCAGAGGTTTTCCAGGCTGCTT       |
| TRAV19   | ACACTGACGACATGGTTCTACATCCACAGCTTCTTCACTTCAACC      |
| TRAV20   | ACACTGACGACATGGTTCTACAGCCACATTAACAAAAGGAAAGCT      |
| TRAV21   | ACACTGACGACATGGTTCTACAGCTCGCTGGATAAATCATCAGGA      |
| TRAV22   | ACACTGACGACATGGTTCTACAACGACTGTCGCTCAGGAAAGCTA      |
| TRAV23   | ACACTGACGACATGGTTCTACACACAATCTCCTCAATAAAGTGGCA     |
| TRAV24   | ACACTGACGACATGGTTCTACAACGAATAAGTCCACTCTTAATACCA    |
| TRAV25   | ACACTGACGACATGGTTCTACAAGTTGGAGAAGCAAAAAGAACAGCT    |
| TRAV26.1 | ACACTGACGACATGGTTCTACAGAAAGCAGAAAGTCCAGCACCT       |
| TRAV26.2 | ACACTGACGACATGGTTCTACAATCGTGAAGCAGAAAGTCCAGT       |
| TRAV27   | ACACTGACGACATGGTTCTACAACAACTTTTCACTTGTGATGCAA      |
| TRAV29   | ACACTGACGACATGGTTCTACACTTAAACAAAAGTCCAAAGCACCTC    |
| TRAV30   | ACACTGACGACATGGTTCTACAATAATCTGCTTCAATTAAGAAAAGG    |
| TRAV34   | ACACTGACGACATGGTTCTACAACCAAGTGGATGAGAAAAGCAGCA     |
| TRAV35   | ACACTGACGACATGGTTCTACACTCAGTTTGGTATAAACCAAGAAAG    |
| TRAV36   | ACACTGACGACATGGTTCTACAGGAAGACTAAGTAGCATATTAGATAAG  |
| TRAV38   | ACACTGACGACATGGTTCTACACTGTGAACCTCCAGAAAAGCAGCCA    |
| TRAV39   | ACACTGACGACATGGTTCTACAACCTCACTGATACCAAGCCCGT       |
| TRAV40   | ACACTGACGACATGGTTCTACAAGGCGAAATATTAAGACAAAACACTC   |
| TRAV41   | ACACTGACGACATGGTTCTACAGATTAATGGCCAAATAAACATACAGG   |

Nested beta forward 2 with adaptor CS1 (in red)

|            |                                                   |
|------------|---------------------------------------------------|
| TRBV2      | ACACTGACGACATGGTTCTACAGCTGATGGATCAAAATTCCTCTG     |
| TRBV3-1    | ACACTGACGACATGGTTCTACATCTCACCTAAATCTCCAGACAAAAGCT |
| TRBV4      | ACACTGACGACATGGTTCTACACCTGAATGCCCAACAGCTCTC       |
| TRBV5-4,8  | ACACTGACGACATGGTTCTACACTCTGAGCTGAATGTGAACGCCT     |
| TRBV5-1    | ACACTGACGACATGGTTCTACAGATTCAGAGGCGCCAGTTCTCT      |
| TRBV6-1    | ACACTGACGACATGGTTCTACATGGTACAATGTCTCCAGATTAACAAA  |
| TRBV6-2,3  | ACACTGACGACATGGTTCTACACCTGATGGCTCAATGTCTCCAGA     |
| TRBV6-4    | ACACTGACGACATGGTTCTACAGTCTCCAGAGCAACACAGATGATT    |
| TRBV6-5,6  | ACACTGACGACATGGTTCTACAGTCTCCAGATCAACCCAGAGGAT     |
| TRBV6-8    | ACACTGACGACATGGTTCTACAGTCTCAGATTAACACAGAGGATTT    |
| TRBV6-9    | ACACTGACGACATGGTTCTACAGGCTACAATGTATCCAGATCAAAAC   |
| TRBV7-2    | ACACTGACGACATGGTTCTACATCGCTTCTGACAGAGGACTGG       |
| TRBV7-3    | ACACTGACGACATGGTTCTACAACGTTCTTTCAGCTCAGGCTGAT     |
| TRBV7-8    | ACACTGACGACATGGTTCTACACCAAGTGTGCTCTTTCAGGAAA      |
| TRBV7-4,6  | ACACTGACGACATGGTTCTACATCTCCACTCTGAMGATCCAGCCCA    |
| TRBV7-7    | ACACTGACGACATGGTTCTACAGCAGAGAGGCTGAGGGATCCAT      |
| TRBV7-9    | ACACTGACGACATGGTTCTACATGACAGAGGCTAAAGGGATCT       |
| TRBV9      | ACACTGACGACATGGTTCTACACTCCGCAACACAGTCCCTGACTT     |
| TRBV10-1,3 | ACACTGACGACATGGTTCTACACAGATGGCTGYAGTGTCTGATGACAAA |
| TRBV10-2   | ACACTGACGACATGGTTCTACAGTTGCTCCAGATCCAAAGCAGAGAA   |
| TRBV11     | ACACTGACGACATGGTTCTACAGCAGAGGCTCAAAGGAGTAGACT     |
| TRBV12-3,4 | ACACTGACGACATGGTTCTACAGTAAAGTGCCTAATGCATCTTCT     |
| TRBV12-5   | ACACTGACGACATGGTTCTACACTCAGCAGAGATGCCTGATGCAACT   |
| TRBV13     | ACACTGACGACATGGTTCTACATCTCAGCTCAACAGTTCTGACTACT   |
| TRBV14     | ACACTGACGACATGGTTCTACAGCTGAAAGGACTGGAGGACGTAT     |
| TRBV15     | ACACTGACGACATGGTTCTACAGATAACTTCAATCCAGGAGGCGC     |
| TRBV16     | ACACTGACGACATGGTTCTACAGCTAAGTCCCTCCAAATTCACCC     |
| TRBV18     | ACACTGACGACATGGTTCTACAGGAACGATTTCTGCTGAATTTCCCA   |
| TRBV19     | ACACTGACGACATGGTTCTACAGGTACAGGCTCTCTCGGAGAAGA     |
| TRBV20-1   | ACACTGACGACATGGTTCTACAGGACAAGTTTCTCATCAACCATGCAA  |
| TRBV24-1   | ACACTGACGACATGGTTCTACATGGATACAGTCTCTCTCAGACGGC    |
| TRBV25-1   | ACACTGACGACATGGTTCTACACCAAGTCTCCAGAAATGAGAGGGA    |
| TRBV27-1   | ACACTGACGACATGGTTCTACATACAAAGTCTCCGAAAAGGAGAGA    |
| TRBV28     | ACACTGACGACATGGTTCTACAGGGGTACAGTGTCTCTAGAGAGA     |
| TRBV29     | ACACTGACGACATGGTTCTACAGTTCCCATCAGCCGCCAAACCTA     |
| TRBV30     | ACACTGACGACATGGTTCTACAGACCCAGGACCCGGCAGTTCT       |
