# Supplementary material for: Tumor invasion in draining lymph nodes is associated with Treg accumulation in breast cancer patients
Source: PubMed Central journal article supplement (PMC7324591; doi:10.1038/s41467-020-17046-2), 2020-06-29
Supplement: 41467_2020_17046_MOESM3_ESM.pdf [file 41467_2020_17046_MOESM3_ESM.pdf]

## Descriptions of Additional Supplementary Files

**File name:** Supplementary Data 1

**Description:** Differential gene expression analysis of T cells from NI and I TDLNs, and tumor. Differentially expressed genes table (DEGs, fold change 1.2,  $p < 0.05$ ) between Tregs and Tconvs in NI (2985) TDLNs, I (868) TDLNs and tumors (1800).

**File name:** Supplementary Data 2

**Description:** Canonical Pathway Analysis of T cells from NI and I TDLNs, and tumor. Canonical Ingenuity Pathway (IPA) table of differentially expressed.

**File name:** Supplementary Data 3

**Description:** EnrichR analysis of differentially expressed genes. Differentially expressed genes (DEGs, fold change 1.2,  $p < 0.05$ ) between Tregs and Tconvs in NI (2985) TDLNs, I (868) TDLNs and tumors (1800).
